# Supplementary material
Source: publisher site journal article supplement (https://www.degruyterbrill.com/publication/isbn/9783110461862/downloadAsset/9783110461862_Beispiele.zip)

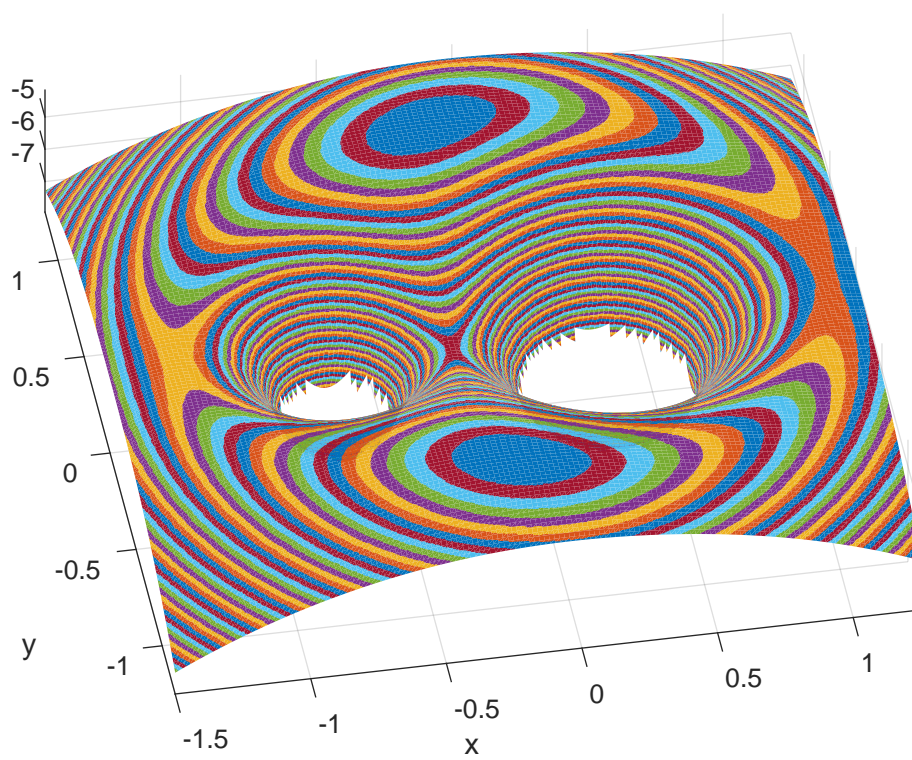

Supplement: Supplementary file 1 [file LagrangePunkt3dC.pdf › SimPhys/programme/kapitel1/Abbildungen/LagrangePunkt3dC.pdf]

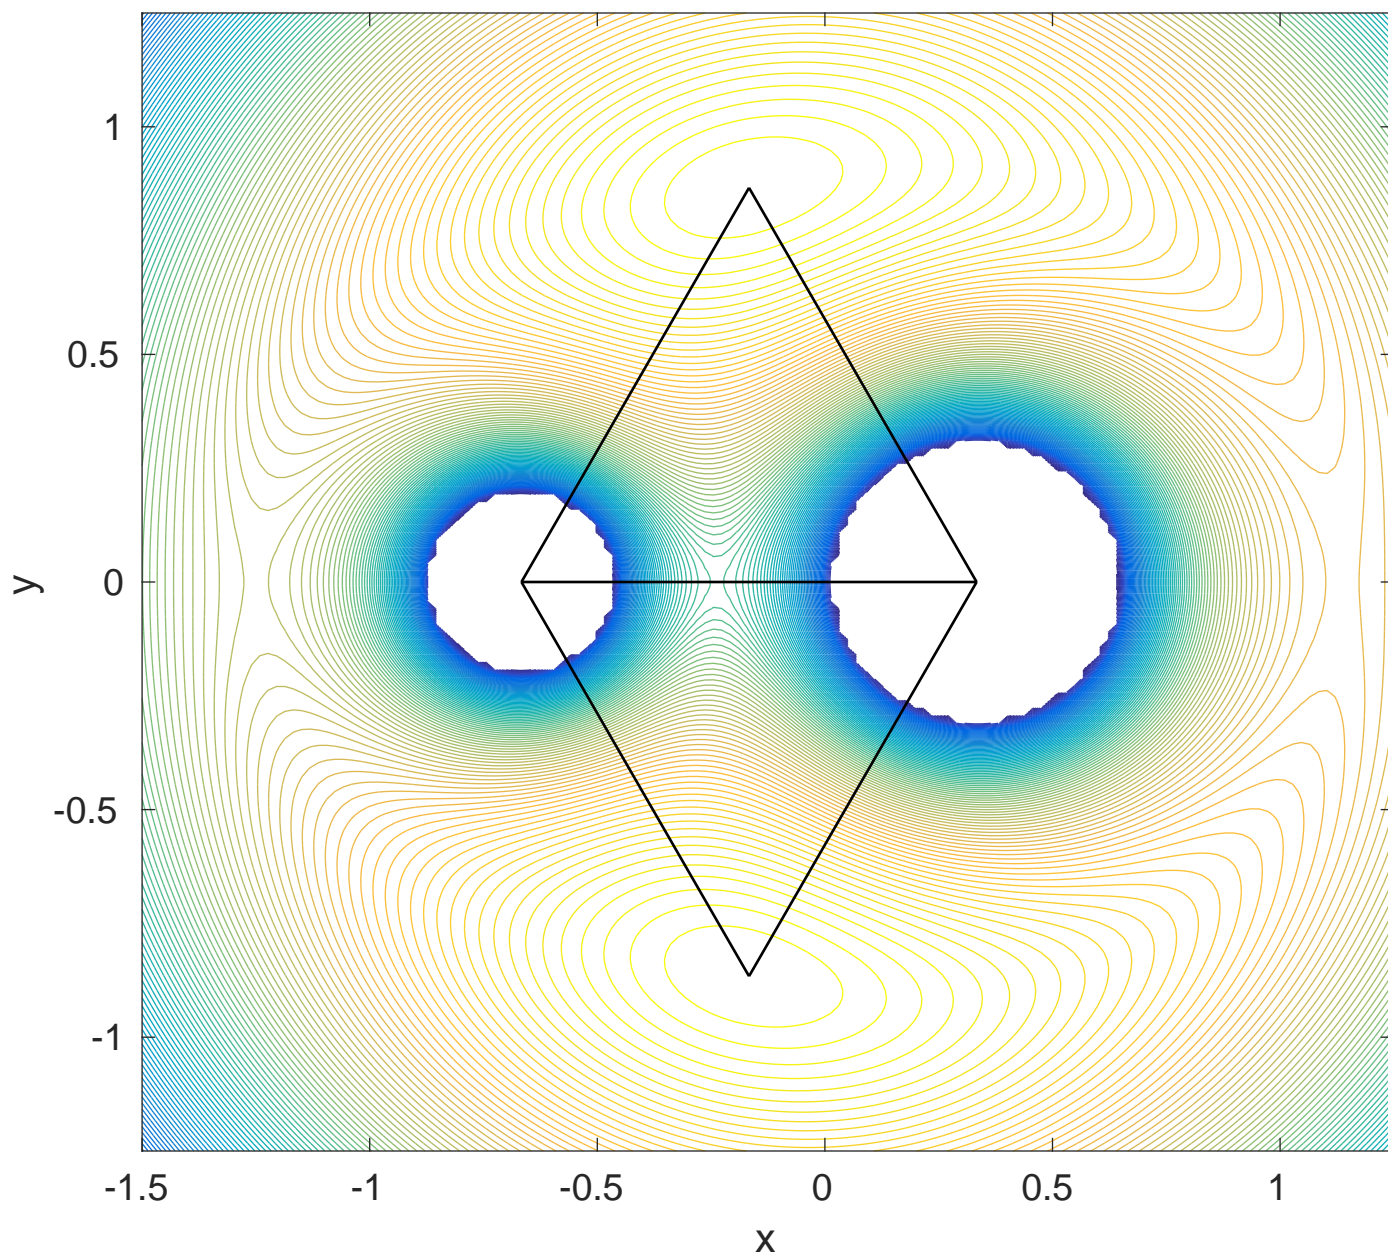

Supplement: Supplementary file 2 [file LagrangePunktC.pdf › SimPhys/programme/kapitel1/Abbildungen/LagrangePunktC.pdf]

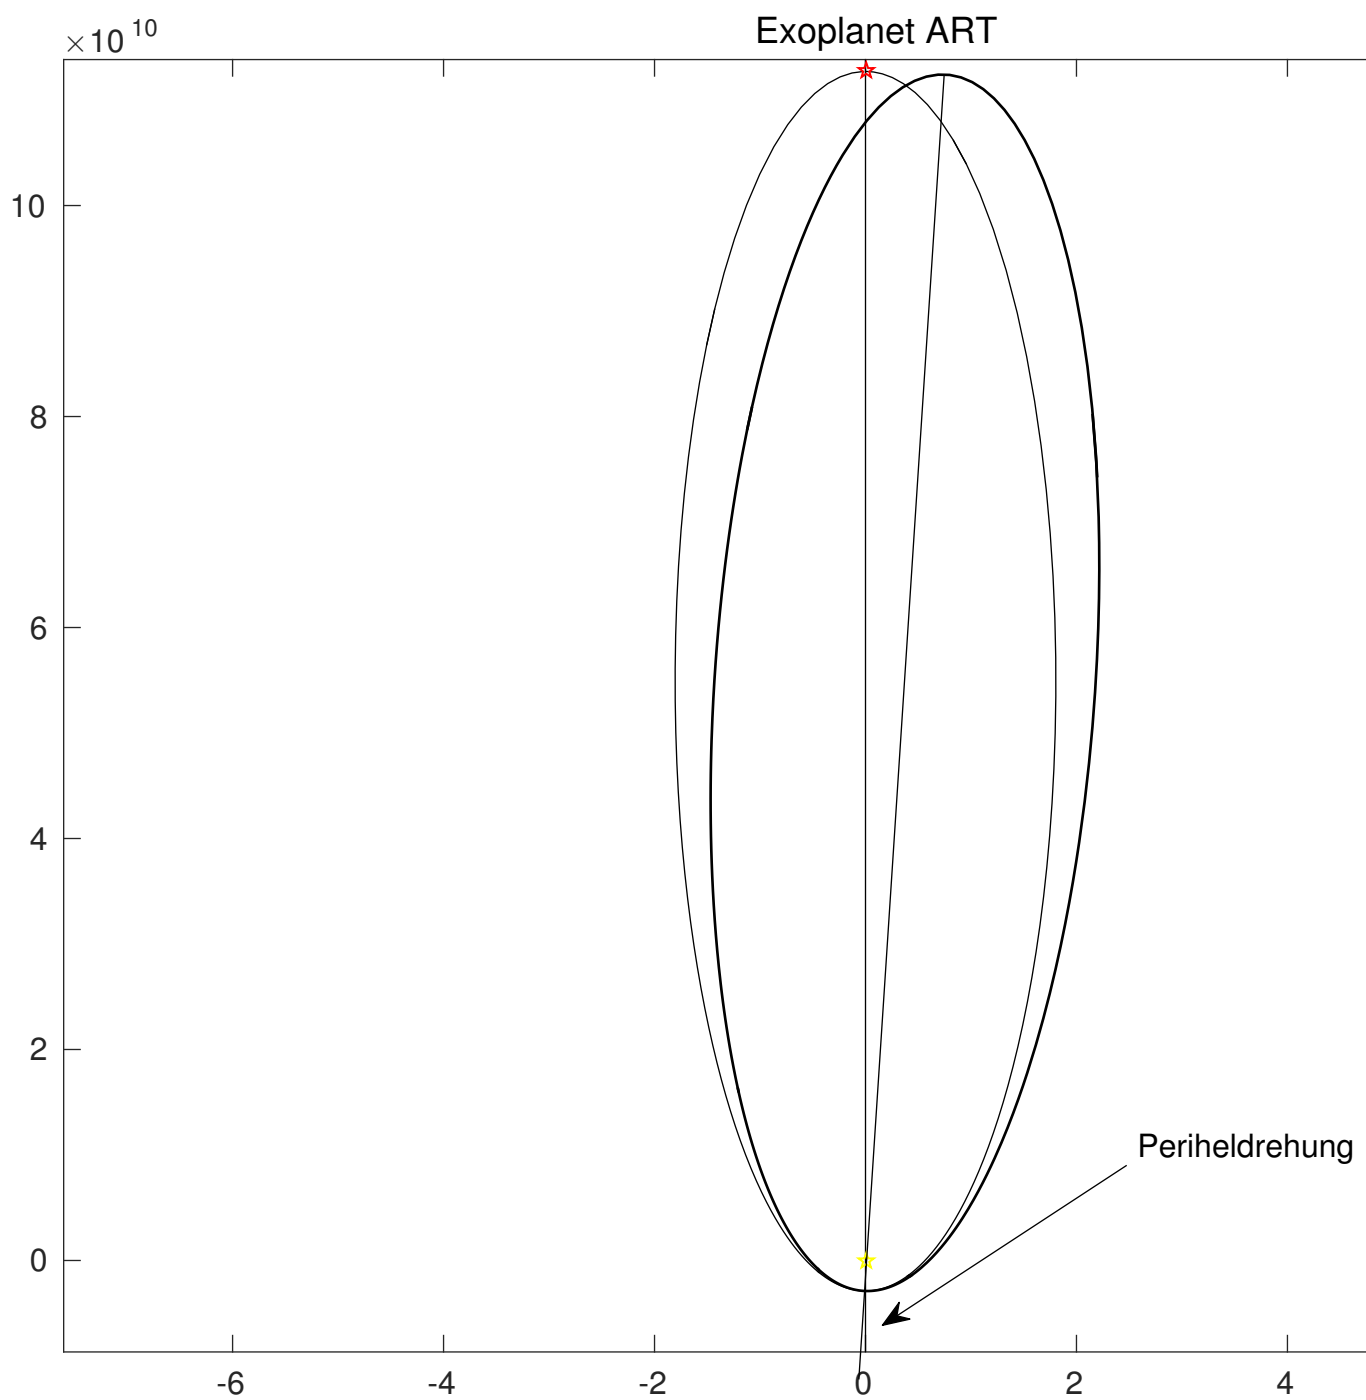

Supplement: Supplementary file 3 [file perihelvisuBW.pdf › SimPhys/programme/kapitel1/Abbildungen/perihelvisuBW.pdf]

$\phi_1 = 12$

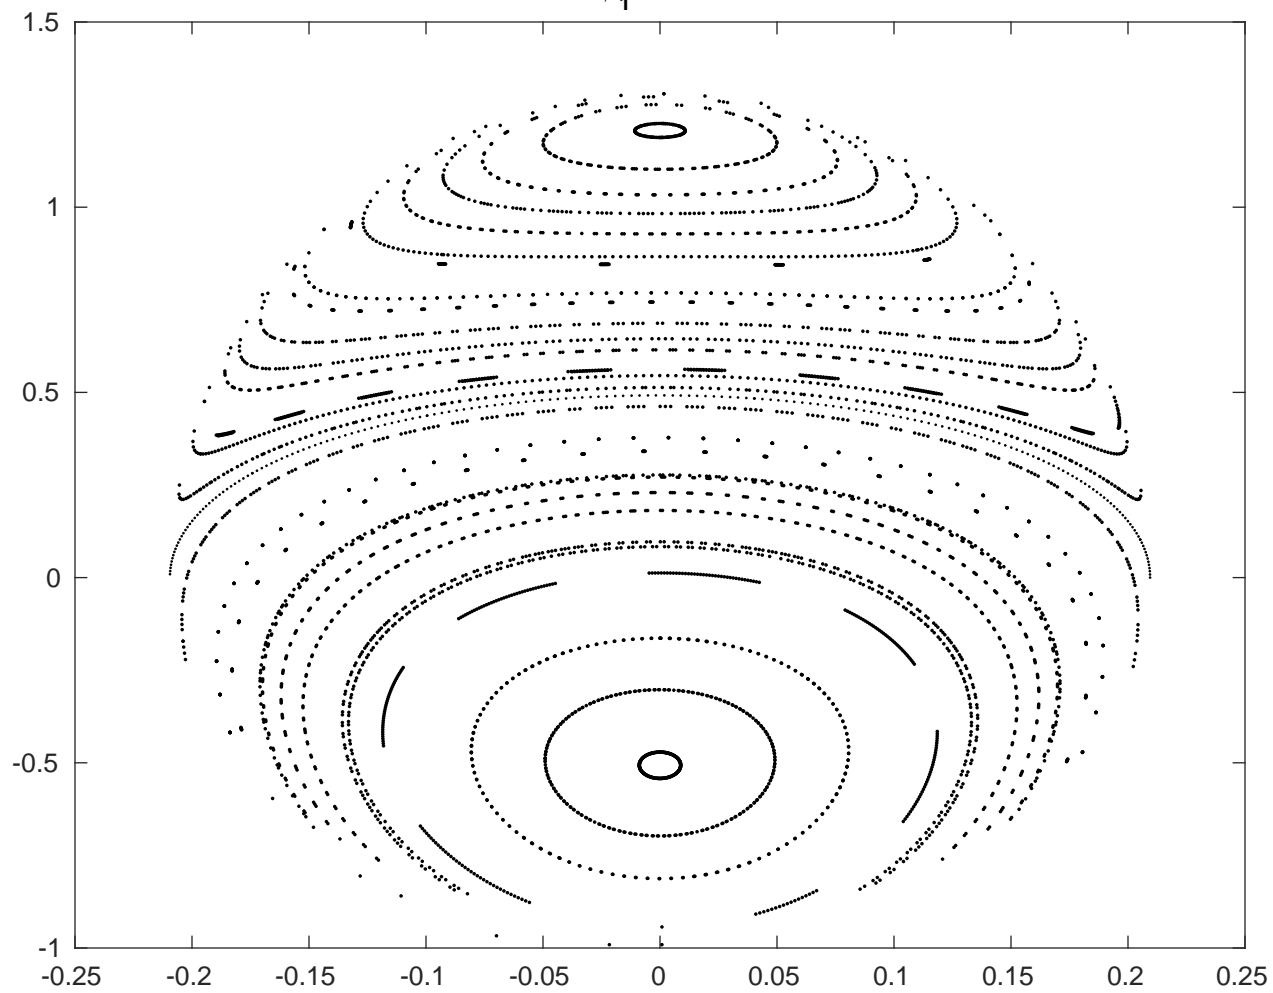

Supplement: Supplementary file 4 [file DopPendelPhi1_12.pdf › SimPhys/programme/kapitel1/Doppelpendel/DopPendelPhi1_12.pdf]

$\phi_1 = 80$

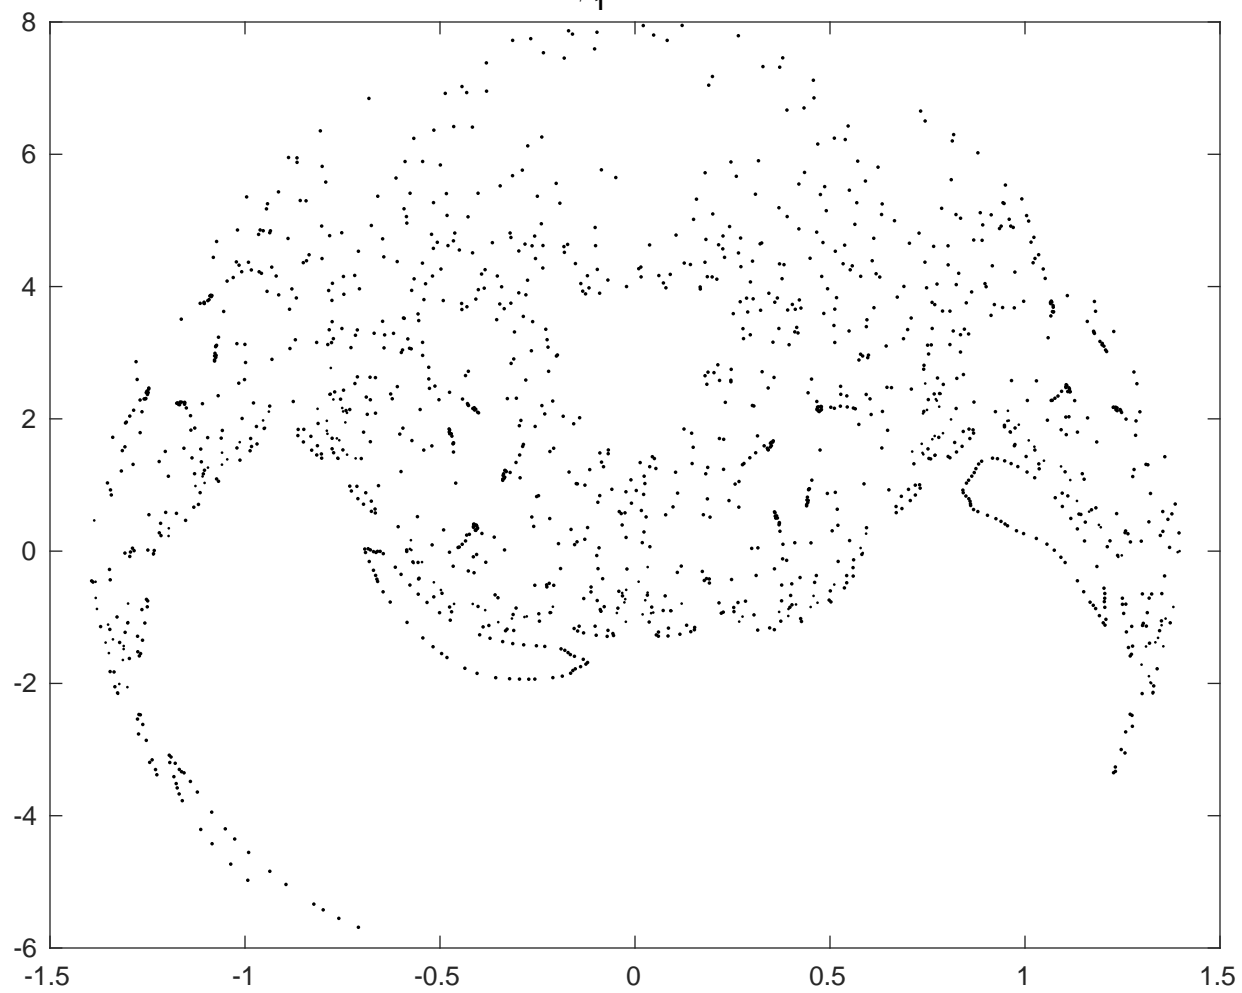

Supplement: Supplementary file 5 [file DopPendelPhi1_80.pdf › SimPhys/programme/kapitel1/Doppelpendel/DopPendelPhi1_80.pdf]
